# Supplementary material
Source: PubMed Central journal article supplement (PMC6456540)
Supplement: ajtr0011-1827-f5.pdf [file ajtr0011-1827-f5.pdf]

## OIP5-AS1 accelerates ox-LDL mediated VECs via EZH2

**Table S1.** Primers sequences for qRT-PCR and sequences of siRNA

| Sequences      |                                                                               |
|----------------|-------------------------------------------------------------------------------|
| si-OIP5-AS1-1# | 5'-GTGACTTAAACAGCTTAAATT-3'                                                   |
| si-OIP5-AS1-2# | 5'-TAAACAGTGACTTTAAATTGT-3'                                                   |
| si-OIP5-AS1-3# | 5'-CATAAATTCTGAAATTAGTT-3'                                                    |
| OIP5-AS1       | Forward, 5'-AGAGAATGGAGAGTGAGGCTACC-3'<br>Reverse, 5'-CCAGGCATGGACAGAGGGAT-3' |
| GSK-3 $\beta$  | Forward, 5'-TGTGATGAAAGACGGCACAC-3'<br>Reverse, 5'-CTTCCTTTGGGTATTGTTTGG-3'   |
| GAPDH          | Forward, 5'-AGAAGGCTGGGGCTCATTG-3'<br>Reverse, 5'-AGGGGCCATCCACAGTCTTC-3'     |
